# Supplementary material
Source: PubMed Central journal article supplement (PMC4091818)
Supplement: NIHMS603989-supplement-12011_2014_33_MOESM1_ESM.pdf [file NIHMS603989-supplement-12011_2014_33_MOESM1_ESM.pdf]

# **Analysis of Human Serum and Whole Blood for Mineral Content by ICP-MS and ICP-OES: Development of a Mineralomics Method**

## **Supplemental Information**

*A manuscript submitted to Biological Trace Element Research*

James M. Harrington<sup>1</sup>, Daniel J. Young<sup>1</sup>, Amal S. Essader<sup>1</sup>, Susan J. Sumner<sup>2</sup>, Keith E. Levine<sup>1</sup>

<sup>1</sup>*Trace Inorganics Department, Technologies for Industry and the Environment, RTI*

*International, Durham, NC27709*

<sup>2</sup>*Discovery Science Technology, RTI International, Research Triangle Park, NC, 27709, USA*

\*Corresponding author e-mail: [jharrington@rti.org](mailto:jharrington@rti.org)

**Table S1. Subject information for samples used in this study**

| <b>Serum samples</b>       |               |            |
|----------------------------|---------------|------------|
| <b>Study Sample ID</b>     | <b>Sex</b>    | <b>Age</b> |
| <b>1</b>                   | <b>Male</b>   | <b>54</b>  |
| <b>2</b>                   | <b>Male</b>   | <b>45</b>  |
| <b>3</b>                   | <b>Male</b>   | <b>39</b>  |
| <b>4</b>                   | <b>Male</b>   | <b>24</b>  |
| <b>5</b>                   | <b>Male</b>   | <b>52</b>  |
| <b>6</b>                   | <b>Female</b> | <b>48</b>  |
| <b>7</b>                   | <b>Female</b> | <b>35</b>  |
| <b>8</b>                   | <b>Female</b> | <b>20</b>  |
| <b>9</b>                   | <b>Female</b> | <b>18</b>  |
| <b>10</b>                  | <b>Female</b> | <b>44</b>  |
| <b>Whole Blood Samples</b> |               |            |
| <b>Study Sample ID</b>     | <b>Sex</b>    | <b>Age</b> |
| <b>1</b>                   | <b>Male</b>   | <b>31</b>  |
| <b>2</b>                   | <b>Male</b>   | <b>47</b>  |
| <b>3</b>                   | <b>Male</b>   | <b>46</b>  |
| <b>4</b>                   | <b>Female</b> | <b>59</b>  |
| <b>5</b>                   | <b>Female</b> | <b>31</b>  |
| <b>6</b>                   | <b>Female</b> | <b>30</b>  |

**Table S2. Serum Intraday Analysis Results (ng element/mL sample), Day 1**

| <b>Sample</b> |                | <b>Ca<sup>a</sup></b> | <b>K<sup>a</sup></b> | <b>Mg<sup>a</sup></b> | <b>Na<sup>a</sup></b> | <b>Cr</b> | <b>Mn</b> | <b>Fe</b> | <b>Co</b> | <b>Cu</b> | <b>Zn</b> | <b>Se</b> | <b>Mo</b> |
|---------------|----------------|-----------------------|----------------------|-----------------------|-----------------------|-----------|-----------|-----------|-----------|-----------|-----------|-----------|-----------|
| 1             | Rep 1          | 92.5                  | 213                  | 14.8                  | 2420                  | ND        | 0.943     | ND        | 0.291     | 1394      | 698       | 107       | 3.17      |
|               | Rep 2          | 90.9                  | 210                  | 14.3                  | 2315                  | ND        | 0.943     | 125       | 0.251     | 1429      | 729       | 108       | 3.33      |
|               | Rep 3          | 97.8                  | 228                  | 16.6                  | 2542                  | ND        | 1.54      | 22.9      | 0.171     | 1438      | 735       | 107       | 2.65      |
|               | <b>Average</b> | 93.7                  | 217                  | 15.2                  | 2426                  | ND        | 1.14      | 74.1      | 0.238     | 1420      | 721       | 107       | 3.05      |
|               | <b>%RSD</b>    | 3.13                  | 3.63                 | 6.38                  | 3.82                  | NA        | 24.7      | 97.8      | 21.0      | 1.33      | 2.28      | 0.583     | 9.51      |
| 2             | Rep 1          | 89.5                  | 195                  | 16.6                  | 2369                  | ND        | 2.02      | 292       | 0.371     | 970       | 681       | 120       | 0.851     |
|               | Rep 2          | 94.8                  | 209                  | 17.7                  | 2551                  | ND        | ND        | 224       | 0.131     | 997       | 765       | 112       | 1.21      |
|               | Rep 3          | 94.4                  | 213                  | 17.8                  | 2614                  | ND        | ND        | 209       | 0.0914    | 988       | 725       | 111       | 1.05      |
|               | <b>Average</b> | 92.9                  | 206                  | 17.4                  | 2512                  | ND        | 2.02      | 242       | 0.198     | 985       | 724       | 114       | 1.04      |
|               | <b>%RSD</b>    | 2.61                  | 3.83                 | 2.96                  | 4.14                  | NA        | NA        | 14.9      | 62.4      | 1.15      | 4.72      | 3.54      | 14.2      |
| 3             | Rep 1          | 86.1                  | 218                  | 17.7                  | 2342                  | ND        | 1.30      | ND        | 0.211     | 949       | 751       | 108       | 1.17      |
|               | Rep 2          | 95.1                  | 244                  | 18.9                  | 2660                  | ND        | ND        | ND        | 0.211     | 981       | 807       | 129       | 1.61      |
|               | Rep 3          | 98.3                  | 253                  | 19.7                  | 2708                  | ND        | 0.303     | 353       | 0.331     | 985       | 779       | 121       | 1.17      |
|               | <b>Average</b> | 93.2                  | 238                  | 18.8                  | 2570                  | ND        | 0.803     | 353       | 0.251     | 972       | 779       | 119       | 1.32      |
|               | <b>%RSD</b>    | 5.55                  | 6.16                 | 4.24                  | 6.32                  | NA        | 88.1      | NA        | 22.5      | 1.64      | 2.89      | 7.18      | 15.7      |
| 4             | Rep 1          | 94.2                  | 220                  | 17.2                  | 2330                  | ND        | 2.02      | 775       | 0.331     | 871       | 840       | 121       | 1.29      |
|               | Rep 2          | 99.5                  | 228                  | 17.7                  | 2355                  | ND        | ND        | 583       | 0.251     | 902       | 901       | 137       | 1.01      |
|               | Rep 3          | 101                   | 236                  | 18.3                  | 2620                  | ND        | 2.22      | 922       | 0.171     | 888       | 936       | 144       | 0.731     |
|               | <b>Average</b> | 98.3                  | 228                  | 17.7                  | 2435                  | ND        | 2.12      | 760       | 0.251     | 887       | 892       | 134       | 1.01      |
|               | <b>%RSD</b>    | 3.01                  | 2.86                 | 2.49                  | 5.39                  | NA        | 6.66      | 18.3      | 26.0      | 1.44      | 4.45      | 7.31      | 22.6      |
| 5             | Rep 1          | 97.3                  | 230                  | 22.0                  | 2547                  | ND        | ND        | 289       | ND        | 1067      | 719       | 118       | 1.05      |
|               | Rep 2          | 99.0                  | 234                  | 22.6                  | 2713                  | ND        | ND        | 186       | ND        | 1099      | 666       | 126       | 0.771     |
|               | Rep 3          | 95.9                  | 230                  | 21.7                  | 2566                  | 2.77      | 1.26      | 1084      | 0.291     | 1103      | 731       | 125       | 0.931     |
|               | <b>Average</b> | 97.4                  | 231                  | 22.1                  | 2609                  | 2.77      | 1.26      | 520       | 0.291     | 1090      | 705       | 123       | 0.918     |
|               | <b>%RSD</b>    | 1.30                  | 0.855                | 1.63                  | 2.84                  | NA        | NA        | 77.2      | NA        | 1.45      | 3.97      | 3.07      | 12.5      |
| 6             | Rep 1          | 97.1                  | 225                  | 20.3                  | 2635                  | ND        | ND        | 76.1      | ND        | 1009      | 863       | 121       | 1.41      |
|               | Rep 2          | 99.3                  | 228                  | 20.8                  | 2730                  | (112)     | 0.783     | 1656      | (305)     | 1068      | 668       | 136       | 1.13      |
|               | Rep 3          | 98.4                  | 222                  | 20.7                  | 2672                  | ND        | 3.50      | 839       | 0.291     | 1049      | 671       | 120       | 1.65      |
|               | <b>Average</b> | 98.3                  | 225                  | 20.6                  | 2679                  | ND        | 2.14      | 857       | 0.291     | 1042      | 734       | 126       | 1.40      |
|               | <b>%RSD</b>    | 0.909                 | 1.02                 | 0.975                 | 1.46                  | NA        | 89.8      | 75.3      | NA        | 2.35      | 12.4      | 5.79      | 15.2      |

**Table S2 (ct'd). Serum Interday Analysis Results (ng element/mL sample), Day 1**

| <b>Sample</b>           |                | <b>Ca<sup>a</sup></b> | <b>K<sup>a</sup></b> | <b>Mg<sup>a</sup></b> | <b>Na<sup>a</sup></b> | <b>Cr</b> | <b>Mn</b> | <b>Fe</b> | <b>Co</b> | <b>Cu</b> | <b>Zn</b> | <b>Se</b> | <b>Mo</b> |
|-------------------------|----------------|-----------------------|----------------------|-----------------------|-----------------------|-----------|-----------|-----------|-----------|-----------|-----------|-----------|-----------|
| 7                       | Rep 1          | 90.5                  | 210                  | 20.1                  | 2517                  | ND        | ND        | 161       | 0.0914    | 1284      | 591       | 117       | 0.331     |
|                         | Rep 2          | 86.1                  | 207                  | 19.6                  | 2434                  | ND        | 0.983     | 707       | 1.49      | 1357      | 540       | 122       | 1.53      |
|                         | Rep 3          | 92.7                  | 219                  | 20.9                  | 2653                  | ND        | 0.823     | 361       | 0.691     | 1355      | 544       | 136       | 0.851     |
|                         | <b>Average</b> | 89.8                  | 212                  | 20.2                  | 2535                  | ND        | 0.903     | 410       | 0.758     | 1332      | 558       | 125       | 1.19      |
|                         | <b>%RSD</b>    | 3.04                  | 2.26                 | 2.49                  | 3.56                  | NA        | 12.5      | 55.0      | 75.6      | 2.56      | 4.18      | 6.27      | 40.4      |
| 8                       | Rep 1          | 87.2                  | 203                  | 16.9                  | 2312                  | ND        | 0.663     | 176       | 0.0114    | 1222      | 667       | 98        | 1.61      |
|                         | Rep 2          | 88.0                  | 205                  | 17.3                  | 2382                  | 2.53      | 0.383     | 246       | 0.0914    | 1299      | 691       | 112       | 1.89      |
|                         | Rep 3          | 94.0                  | 226                  | 18.2                  | 2625                  | 4.25      | 1.18      | 528       | 0.171     | 1305      | 733       | 99        | 1.29      |
|                         | <b>Average</b> | 89.7                  | 211                  | 17.5                  | 2440                  | 3.39      | 0.743     | 317       | 0.131     | 1275      | 697       | 103       | 1.60      |
|                         | <b>%RSD</b>    | 3.41                  | 5.02                 | 3.05                  | 5.50                  | 35.9      | 44.6      | 48.1      | 43.0      | 2.97      | 3.91      | 6.31      | 15.3      |
| 9                       | Rep 1          | 96.5                  | 226                  | 17.3                  | 2658                  | (6340)    | 20.7      | 8290      | (5500)    | 1233      | 776       | 122       | 2.21      |
|                         | Rep 2          | 102                   | 237                  | 18.1                  | 2693                  | ND        | 4.66      | 3134      | 0.131     | 1276      | 785       | 150       | 1.29      |
|                         | Rep 3          | 101                   | 227                  | 18.2                  | 2738                  | ND        | ND        | 705       | 0.0114    | 1262      | 835       | 141       | 2.09      |
|                         | <b>Average</b> | 99.9                  | 230                  | 17.9                  | 2697                  | ND        | 12.7      | 4043      | 0.131     | 1257      | 799       | 137       | 1.86      |
|                         | <b>%RSD</b>    | 2.43                  | 2.07                 | 2.25                  | 1.21                  | NA        | 89.5      | 78.2      | NA        | 1.43      | 3.23      | 8.55      | 21.9      |
| 10                      | Rep 1          | 92.3                  | 226                  | 12.8                  | 2471                  | ND        | ND        | 332       | 0.211     | 1357      | 638       | 126       | 1.69      |
|                         | Rep 2          | 94.3                  | 234                  | 13.2                  | 2549                  | 1.21      | ND        | 230       | 0.211     | 1386      | 616       | 130       | 1.53      |
|                         | Rep 3          | 100.1                 | 247                  | 13.6                  | 2513                  | 14.2      | 3.66      | 1077      | 0.531     | 1397      | 643       | 127       | 1.97      |
|                         | <b>Average</b> | 95.6                  | 236                  | 13.2                  | 2511                  | 14.2      | 3.66      | 546       | 0.318     | 1380      | 632       | 128       | 1.73      |
|                         | <b>%RSD</b>    | 3.48                  | 3.69                 | 2.54                  | 1.27                  | 64.7      | NA        | 69.2      | 47.4      | 1.22      | 1.85      | 1.38      | 10.5      |
| Pool                    | Rep 1          | 96.4                  | 227                  | 17.8                  | 2551                  | ND        | 1.10      | 442       | 0.0914    | 1147      | 743       | 117       | 1.57      |
|                         | Rep 2          | 98.4                  | 227                  | 17.9                  | 2520                  | ND        | ND        | 162       | 0.0114    | 1156      | 728       | 119       | 1.49      |
|                         | Rep 3          | 91.4                  | 213                  | 16.7                  | 2440                  | 3.17      | 2.86      | 1929      | 0.731     | 1205      | 747       | 145       | 1.57      |
|                         | <b>Average</b> | 95.4                  | 222                  | 17.5                  | 2504                  | 3.17      | 1.98      | 1929      | 0.411     | 1170      | 740       | 127       | 1.54      |
|                         | <b>%RSD</b>    | 3.07                  | 2.99                 | 3.20                  | 1.87                  | NA        | 62.8      | 40.2      | 110       | 2.19      | 1.10      | 9.94      | 2.44      |
| <b>Average</b>          |                | 94.9                  | 224                  | 18.0                  | 2542                  | 6.78      | 2.75      | 812       | 0.286     | 1164      | 724       | 122       | 1.51      |
| <b>% Diff from pool</b> |                | -0.531                | 0.461                | 3.31                  | 1.50                  | 114       | 38.7      | -57.9     | -30.5     | -0.475    | -2.08     | -4.36     | -2.11     |

**Table S3. Serum Intraday Analysis Results (ng element/mL sample), Day 2**

| <b>Sample</b> |                | <b>Ca<sup>a</sup></b> | <b>K<sup>a</sup></b> | <b>Mg<sup>a</sup></b> | <b>Na<sup>a</sup></b> | <b>Cr</b> | <b>Mn</b> | <b>Fe</b> | <b>Co</b> | <b>Cu</b> | <b>Zn</b> | <b>Se</b> | <b>Mo</b> |
|---------------|----------------|-----------------------|----------------------|-----------------------|-----------------------|-----------|-----------|-----------|-----------|-----------|-----------|-----------|-----------|
| 1             | Rep 1          | 90.6                  | 207                  | 14.3                  | 1988                  | 3.06      | 2.06      | 645       | 0.309     | 1414      | 717       | 93.2      | 4.30      |
|               | Rep 2          | 94.9                  | 214                  | 15.0                  | 2166                  | ND        | 2.90      | 383       | 0.349     | 1435      | 738       | 108       | 4.14      |
|               | Rep 3          | 94.8                  | 218                  | 15.1                  | 2064                  | (20.4)    | 1.26      | 243       | 28.1      | 1441      | 850       | 112       | 4.78      |
|               | <b>Average</b> | 93.4                  | 213                  | 14.8                  | 2073                  | 3.06      | 2.07      | 424       | 0.329     | 1430      | 768       | 105       | 4.41      |
|               | <b>%RSD</b>    | 2.18                  | 2.20                 | 2.34                  | 3.52                  | NA        | 32.3      | 39.4      | 8.61      | 0.825     | 7.59      | 7.85      | 6.17      |
| 2             | Rep 1          | 94.5                  | 205                  | 17.8                  | 2291                  | ND        | 1.94      | 494       | 0.109     | 983       | 715       | 126       | 1.66      |
|               | Rep 2          | 91.9                  | 198                  | 17.4                  | 2252                  | 2.74      | 3.62      | 677       | 0.189     | 969       | 720       | 114       | 2.38      |
|               | Rep 3          | 89.7                  | 201                  | 17.2                  | 2201                  | ND        | 0.577     | 560       | ND        | 955       | 714       | 115       | 1.62      |
|               | <b>Average</b> | 92.0                  | 202                  | 17.5                  | 2248                  | 2.74      | 2.04      | 577       | 0.149     | 969       | 716       | 118       | 1.89      |
|               | <b>%RSD</b>    | 2.11                  | 1.38                 | 1.48                  | 1.64                  | NA        | 60.8      | 13.1      | 38.1      | 1.20      | 0.330     | 4.76      | 18.5      |
| 3             | Rep 1          | 93.0                  | 233                  | 18.5                  | 2285                  | ND        | 1.42      | 364       | 0.429     | 961       | 772       | 124       | 1.54      |
|               | Rep 2          | 96.0                  | 241                  | 19.1                  | 2375                  | 1.98      | ND        | 132       | 0.349     | 983       | 780       | 112       | 1.78      |
|               | Rep 3          | 95.3                  | 238                  | 19.0                  | 2396                  | (12.4)    | 0.737     | 398       | 0.629     | 965       | 778       | 119       | 5.30      |
|               | <b>Average</b> | 94.8                  | 237                  | 18.9                  | 2352                  | 1.98      | 1.08      | 298       | 0.469     | 970       | 776       | 118       | 2.88      |
|               | <b>%RSD</b>    | 1.36                  | 1.41                 | 1.25                  | 2.05                  | NA        | 44.6      | 39.7      | 25.1      | 0.982     | 0.455     | 4.17      | 59.8      |
| 4             | Rep 1          | 96.2                  | 220                  | 17.7                  | 2295                  | (71.8)    | 8.30      | 1269      | 1.79      | 897       | 966       | 136       | 7.82      |
|               | Rep 2          | 96.8                  | 220                  | 18.3                  | 2374                  | 3.78      | 1.54      | 778       | 0.309     | 907       | 904       | 148       | 2.90      |
|               | Rep 3          | 95.4                  | 214                  | 17.4                  | 2284                  | ND        | 0.497     | 1206      | 0.149     | 895       | 908       | 141       | 1.50      |
|               | <b>Average</b> | 96.1                  | 218                  | 17.8                  | 2318                  | 3.78      | 3.44      | 1084      | 0.749     | 900       | 926       | 141       | 4.08      |
|               | <b>%RSD</b>    | 0.598                 | 1.30                 | 2.12                  | 1.73                  | NA        | 100       | 20.1      | 98.6      | 0.571     | 3.10      | 3.47      | 66.5      |
| 5             | Rep 1          | 97.0                  | 225                  | 22.3                  | 2379                  | ND        | 1.66      | 241       | 0.171     | 1098      | 685       | 130       | 2.69      |
|               | Rep 2          | 96.8                  | 221                  | 22.0                  | 2229                  | 5.81      | 2.46      | 438       | 3.69      | 1111      | 677       | 126       | 2.25      |
|               | Rep 3          | 93.6                  | 216                  | 21.3                  | 2290                  | ND        | 1.06      | 197       | 0.0914    | 1077      | 678       | 114       | 2.09      |
|               | <b>Average</b> | 95.8                  | 221                  | 21.9                  | 2299                  | 5.81      | 1.73      | 292       | 1.32      | 1095      | 680       | 123       | 2.34      |
|               | <b>%RSD</b>    | 1.65                  | 1.71                 | 1.78                  | 2.68                  | NA        | 33.2      | 35.9      | 127       | 1.25      | 0.557     | 5.60      | 10.8      |
| 6             | Rep 1          | 99.4                  | 221                  | 21.1                  | 2257                  | ND        | ND        | 99.7      | 0.331     | 1046      | 653       | 132       | 2.13      |
|               | Rep 2          | 96.9                  | 219                  | 20.9                  | 2190                  | 2.77      | 6.22      | 1200      | 0.291     | 1036      | 639       | 126       | 2.57      |
|               | Rep 3          | 100                   | 220                  | 20.9                  | 2226                  | ND        | ND        | 82.1      | ND        | 1039      | 635       | 113       | 2.53      |
|               | <b>Average</b> | 98.9                  | 220                  | 20.9                  | 2224                  | 2.77      | 6.22      | 460       | 0.311     | 1040      | 642       | 124       | 2.41      |
|               | <b>%RSD</b>    | 1.48                  | 0.447                | 0.474                 | 1.23                  | NA        | NA        | 113.5     | 9.08      | 0.422     | 1.19      | 6.17      | 8.24      |

**Table S3 (ct'd). Serum Interday Analysis Results (ng element/mL sample), Day 2**

| <b>Sample</b>           |                | <b>Ca<sup>a</sup></b> | <b>K<sup>a</sup></b> | <b>Mg<sup>a</sup></b> | <b>Na<sup>a</sup></b> | <b>Cr</b> | <b>Mn</b> | <b>Fe</b> | <b>Co</b> | <b>Cu</b> | <b>Zn</b> | <b>Se</b> | <b>Mo</b> |
|-------------------------|----------------|-----------------------|----------------------|-----------------------|-----------------------|-----------|-----------|-----------|-----------|-----------|-----------|-----------|-----------|
| 7                       | Rep 1          | 91.8                  | 212                  | 20.7                  | 2110                  | ND        | ND        | 660       | 0.629     | 1223      | 570       | 121       | 1.10      |
|                         | Rep 2          | 89.8                  | 209                  | 20.7                  | 2092                  | (11384)   | 31.2      | 1054      | (2687)    | 1219      | 592       | 123       | 1.42      |
|                         | Rep 3          | 89.6                  | 207                  | 20.3                  | 2082                  | 3.01      | 0.457     | 495       | 2.75      | 1235      | 578       | 127       | 1.42      |
|                         | <b>Average</b> | 90.4                  | 209                  | 20.6                  | 2095                  | 3.01      | 15.8      | 736       | 1.69      | 1225      | 580       | 124       | 1.32      |
|                         | <b>%RSD</b>    | 1.08                  | 1.10                 | 0.872                 | 0.553                 | NA        | 137       | 31.8      | 88.8      | 0.566     | 1.59      | 1.92      | 11.5      |
| 8                       | Rep 1          | 92.4                  | 207                  | 17.9                  | 1898                  | ND        | ND        | 480       | 0.589     | 1137      | 630       | 105       | 1.18      |
|                         | Rep 2          | 93.3                  | 212                  | 18.4                  | 2033                  | ND        | 1.74      | 642       | 0.349     | 1155      | 688       | 111       | 1.94      |
|                         | Rep 3          | 93.4                  | 212                  | 18.3                  | 2122                  | ND        | ND        | 560       | 0.109     | 1183      | 658       | 113       | 0.863     |
|                         | <b>Average</b> | 93.0                  | 210                  | 18.2                  | 2018                  | ND        | 1.74      | 561       | 0.349     | 1159      | 659       | 110       | 1.33      |
|                         | <b>%RSD</b>    | 0.482                 | 1.03                 | 1.07                  | 4.56                  | NA        | NA        | 11.8      | 56.2      | 1.64      | 3.62      | 3.37      | 34.1      |
| 9                       | Rep 1          | 94.8                  | 210                  | 17.1                  | 2198                  | ND        | 0.497     | 1023      | 0.189     | 1184      | 786       | 139       | 0.983     |
|                         | Rep 2          | 96.0                  | 209                  | 17.2                  | 2146                  | 2.86      | 1.58      | 1198      | 0.149     | 1219      | 802       | 136       | 1.38      |
|                         | Rep 3          | 99.2                  | 222                  | 17.9                  | 2312                  | ND        | 3.46      | 1586      | 0.229     | 1239      | 841       | 137       | 2.46      |
|                         | <b>Average</b> | 96.7                  | 213                  | 17.4                  | 2219                  | 2.86      | 1.84      | 1269      | 0.189     | 1214      | 810       | 137       | 1.61      |
|                         | <b>%RSD</b>    | 1.92                  | 2.72                 | 2.04                  | 3.12                  | NA        | 66.3      | 18.6      | 17.3      | 1.86      | 2.88      | 0.994     | 38.8      |
| 10                      | Rep 1          | 93.6                  | 224                  | 13.0                  | 2005                  | (604)     | 2.18      | 1026      | (957)     | 1348      | 636       | 127       | 1.94      |
|                         | Rep 2          | 91.1                  | 213                  | 12.5                  | 1930                  | 1.50      | 1.02      | 666       | 0.869     | 1313      | 631       | 125       | 2.10      |
|                         | Rep 3          | 92.0                  | 219                  | 12.7                  | 1989                  | ND        | 2.02      | 753       | 0.549     | 1306      | 624       | 136       | 2.02      |
|                         | <b>Average</b> | 92.2                  | 219                  | 12.7                  | 1975                  | 1.50      | 1.74      | 815       | 1         | 1322      | 631       | 129       | 2.02      |
|                         | <b>%RSD</b>    | 1.14                  | 2.17                 | 1.82                  | 1.63                  | NA        | 29.5      | 18.8      | 31.9      | 1.38      | 0.779     | 3.50      | 3.23      |
| Pool                    | Rep 1          | 98.6                  | 227                  | 18.8                  | 2213                  | ND        | ND        | 585       | 0.349     | 1176.1    | 746       | 123       | 1.86      |
|                         | Rep 2          | 94.2                  | 214                  | 18.2                  | 2158                  | ND        | 45.8      | 3982      | 1.07      | 1189.7    | 772       | 128       | 2.14      |
|                         | Rep 3          | 96.1                  | 219                  | 18.6                  | 2138                  | ND        | ND        | 568       | 0.109     | 1190.1    | 752       | 131       | 2.02      |
|                         | <b>Average</b> | 96.3                  | 220                  | 18.5                  | 2170                  | ND        | 45.8      | 1712      | 0.509     | 1185      | 757       | 127       | 2.01      |
|                         | <b>%RSD</b>    | 1.90                  | 2.41                 | 1.33                  | 1.46                  | NA        | NA        | 93.8      | 80.2      | 0.549     | 1.49      | 2.72      | 5.71      |
| <b>Average</b>          |                | 94.3                  | 216                  | 18.1                  | 2182                  | 3.06      | 7.59      | 748       | 0.615     | 1137      | 722       | 123       | 2.39      |
| <b>% Diff from pool</b> |                | -2.02                 | -1.66                | -2.51                 | 0.567                 | NA        | -83.4     | -56.3     | 21.0      | -4.06     | -4.56     | -3.02     | 19.0      |

**Table S4. Serum Intraday Analysis Results (ng element/mL sample), Day 3**

| <b>Sample</b> |                | <b>Ca<sup>a</sup></b> | <b>K<sup>a</sup></b> | <b>Mg<sup>a</sup></b> | <b>Na<sup>a</sup></b> | <b>Cr</b> | <b>Mn</b> | <b>Fe</b> | <b>Co</b> | <b>Cu</b> | <b>Zn</b> | <b>Se</b> | <b>Mo</b> |
|---------------|----------------|-----------------------|----------------------|-----------------------|-----------------------|-----------|-----------|-----------|-----------|-----------|-----------|-----------|-----------|
| 1             | Rep 1          | 92.9                  | 210                  | 14.6                  | 2350                  | 4.27      | 2.38      | 687       | ND        | 1370      | 750       | 115       | 3.75      |
|               | Rep 2          | 96.0                  | 217                  | 14.8                  | 2330                  | ND        | ND        | ND        | 0.160     | 1416      | 808       | 120       | 3.35      |
|               | Rep 3          | 97.0                  | 217                  | 14.9                  | 2351                  | ND        | ND        | 544       | 0.160     | 1403      | 785       | 113       | 3.03      |
|               | <b>Average</b> | 95.3                  | 214                  | 14.8                  | 2344                  | 4.27      | 2.38      | 615       | 0.160     | 1396      | 781       | 116       | 3.38      |
|               | <b>%RSD</b>    | 1.82                  | 1.54                 | 0.736                 | 0.413                 | NA        | NA        | 16.5      | 0         | 1.39      | 3.05      | 2.59      | 8.71      |
| 2             | Rep 1          | 93.9                  | 201                  | 17.2                  | 2296                  | (21.6)    | ND        | 6410      | ND        | 943       | 736       | 134       | ND        |
|               | Rep 2          | 89.8                  | 188                  | 16.4                  | 2129                  | ND        | ND        | 152       | ND        | 889       | 714       | 125       | ND        |
|               | Rep 3          | 90.7                  | 193                  | 16.6                  | 2242                  | 1.75      | ND        | 430       | ND        | 921       | 718       | 124       | 0.714     |
|               | <b>Average</b> | 91.5                  | 194                  | 16.7                  | 2222                  | 1.75      | ND        | 2331      | 0.120     | 917       | 723       | 128       | 0.714     |
|               | <b>%RSD</b>    | 1.93                  | 2.79                 | 1.98                  | 3.13                  | NA        | NA        | 124       | NA        | 2.43      | 1.33      | 3.62      | NA        |
| 3             | Rep 1          | 91.3                  | 223                  | 17.6                  | 2284                  | ND        | ND        | ND        | ND        | 991       | 755       | 128       | 0.554     |
|               | Rep 2          | 91.7                  | 222                  | 17.6                  | 2370                  | 3.63      | ND        | 16.9      | ND        | 883       | 774       | 130       | ND        |
|               | Rep 3          | 93.1                  | 225                  | 18.0                  | 2390                  | (50.2)    | ND        | ND        | 54.6      | 906       | 753       | 141       | ND        |
|               | <b>Average</b> | 92.1                  | 223                  | 17.7                  | 2348                  | 3.63      | ND        | 16.85     | ND        | 927       | 761       | 133       | 0.554     |
|               | <b>%RSD</b>    | 0.835                 | 0.569                | 1.17                  | 1.96                  | NA        | NA        | NA        | NA        | 4.98      | 1.23      | 4.28      | NA        |
| 4             | Rep 1          | 97.0                  | 213                  | 16.9                  | 2281                  | ND        | ND        | 519       | 0         | 840       | 903       | 150       | ND        |
|               | Rep 2          | 92.7                  | 204                  | 16.2                  | 2238                  | (92.6)    | 21.4      | 1302      | 0.480     | 820       | 923       | 137       | 1.75      |
|               | Rep 3          | 91.4                  | 199                  | 16.2                  | 2203                  | (35043)   | 66.5      | 4866      | 6424      | 841       | 938       | 140       | 0.554     |
|               | <b>Average</b> | 93.7                  | 206                  | 16.4                  | 2241                  | ND        | 44.0      | 2229      | 0.480     | 834       | 921       | 142       | 1.15      |
|               | <b>%RSD</b>    | 2.56                  | 2.77                 | 2.15                  | 1.42                  | NA        | 72.5      | 84.9      | NA        | 1.19      | 1.53      | 3.90      | 73.5      |
| 5             | Rep 1          | 94.3                  | 207                  | 20.8                  | 2282                  | ND        | ND        | 341       | 0.0400    | 1007      | 714       | 130       | ND        |
|               | Rep 2          | 97.7                  | 213                  | 21.4                  | 2464                  | ND        | ND        | 379       | ND        | 1050      | 715       | 124       | ND        |
|               | Rep 3          | 96.0                  | 214                  | 21.2                  | 2364                  | 1.55      | ND        | 624       | ND        | 1036      | 710       | 134       | ND        |
|               | <b>Average</b> | 96.0                  | 211                  | 21.2                  | 2370                  | 1.55      | ND        | 448       | ND        | 1031      | 713       | 129       | ND        |
|               | <b>%RSD</b>    | 1.45                  | 1.36                 | 1.10                  | 3.14                  | NA        | NA        | 28.1      | NA        | 1.74      | 0.261     | 3.07      | NA        |
| 6             | Rep 1          | 88.1                  | 183                  | 17.9                  | 2215                  | ND        | ND        | 112       | -0.200    | 917       | 648       | 126       | ND        |
|               | Rep 2          | 89.5                  | 190                  | 18.5                  | 2308                  | (87.8)    | 10.7      | 795       | 0.480     | 941       | 718       | 127       | 1.87      |
|               | Rep 3          | 92.2                  | 196                  | 18.9                  | 2323                  | 4.23      | 8.22      | 1306      | 0.120     | 965       | 682       | 124       | 1.35      |
|               | <b>Average</b> | 89.9                  | 190                  | 18.5                  | 2282                  | 4.23      | 9.44      | 738       | 0.300     | 941       | 682       | 126       | 1.61      |
|               | <b>%RSD</b>    | 1.87                  | 2.74                 | 2.27                  | 2.09                  | NA        | 18.3      | 66.3      | 84.9      | 2.05      | 4.17      | 0.729     | 22.8      |

**Table S4 (ct'd). Serum Interday Analysis Results (ng element/mL sample), Day 3**

| <b>Sample</b>           |                | <b>Ca<sup>a</sup></b> | <b>K<sup>a</sup></b> | <b>Mg<sup>a</sup></b> | <b>Na<sup>a</sup></b> | <b>Cr</b> | <b>Mn</b> | <b>Fe</b> | <b>Co</b> | <b>Cu</b> | <b>Zn</b> | <b>Se</b> | <b>Mo</b> |
|-------------------------|----------------|-----------------------|----------------------|-----------------------|-----------------------|-----------|-----------|-----------|-----------|-----------|-----------|-----------|-----------|
| 7                       | Rep 1          | 91.1                  | 202                  | 20.0                  | 2371                  | 3.43      | 11.7      | 1320      | 0.480     | 1277      | 552       | 126       | 0.954     |
|                         | Rep 2          | 91.3                  | 210                  | 19.9                  | 2466                  | ND        | 2.58      | 244       | ND        | 1216      | 537       | 125       | 2.51      |
|                         | Rep 3          | 91.7                  | 201                  | 20.1                  | 2414                  | ND        | 15.8      | 357       | ND        | 1253      | 585       | 121       | 0.634     |
|                         | <b>Average</b> | 91.4                  | 205                  | 20.0                  | 2417                  | 3.43      | 10.0      | 640       | 0.480     | 1249      | 558       | 124       | 1.37      |
|                         | <b>%RSD</b>    | 0.251                 | 1.88                 | 0.409                 | 1.61                  | NA        | 55.2      | 75.3      | NA        | 2.00      | 3.60      | 1.46      | 60.05     |
| 8                       | Rep 1          | 95.8                  | 210                  | 18.5                  | 2418                  | 0.749     | ND        | 376       | ND        | 1225      | 686       | 114       | ND        |
|                         | Rep 2          | 95.3                  | 216                  | 18.4                  | 2481                  | ND        | 8.46      | 396       | 0.280     | 1285      | 668       | 109       | 2.23      |
|                         | Rep 3          | 98.1                  | 221                  | 18.5                  | 2468                  | ND        | ND        | 300       | 0.120     | 1217      | 698       | 111       | 2.11      |
|                         | <b>Average</b> | 96.4                  | 216                  | 18.5                  | 2456                  | ND        | 8.46      | 357       | 0.200     | 1243      | 684       | 112       | 2.17      |
|                         | <b>%RSD</b>    | 1.30                  | 2.05                 | 0.408                 | 1.11                  | NA        | NA        | 11.5      | 56.6      | 2.44      | 1.76      | 1.78      | 3.90      |
| 9                       | Rep 1          | 92.6                  | 206                  | 16.3                  | 2344                  | ND        | ND        | 760       | ND        | 1138      | 788       | 143       | 2.35      |
|                         | Rep 2          | 96.5                  | 214                  | 17.1                  | 2517                  | ND        | ND        | 747       | 0.360     | 1195      | 840       | 150       | 2.11      |
|                         | Rep 3          | 97.4                  | 214                  | 17.0                  | 2489                  | ND        | ND        | 796       | ND        | 1193      | 817       | 154       | 2.23      |
|                         | <b>Average</b> | 95.5                  | 211                  | 16.8                  | 2450                  | ND        | ND        | 768       | 0.360     | 1175      | 815       | 149       | 2.23      |
|                         | <b>%RSD</b>    | 2.16                  | 1.74                 | 2.25                  | 3.09                  | NA        | NA        | 2.67      | NA        | 2.23      | 2.57      | 3.28      | 4.39      |
| 10                      | Rep 1          | 95.7                  | 229                  | 13.0                  | 2451                  | ND        | 7.02      | 359       | ND        | 1331      | 653       | 144       | 1.99      |
|                         | Rep 2          | 97.6                  | 234                  | 13.0                  | 2382                  | ND        | ND        | 332       | 0.240     | 1335      | 646       | 133       | 1.75      |
|                         | Rep 3          | 95.5                  | 222                  | 12.9                  | 2312                  | 1563      | 261       | 1274      | 3229      | 1353      | 660       | 141       | 0.634     |
|                         | <b>Average</b> | 96.3                  | 228                  | 13.0                  | 2382                  | ND        | 7.02      | 655       | 0.240     | 1340      | 653       | 139       | 1.46      |
|                         | <b>%RSD</b>    | 0.983                 | 2.26                 | 0.442                 | 2.38                  | NA        | NA        | 66.8      | NA        | 0.69      | 0.851     | 3.27      | 40.6      |
| Pool                    | Rep 1          | 96.3                  | 224                  | 17.7                  | 2460                  | ND        | 21.1      | 486       | 0.160     | 1118      | 719       | 132       | 1.87      |
|                         | Rep 2          | 98.1                  | 233                  | 18.3                  | 2638                  | 2.51      | ND        | 274       | 2.92      | 1135      | 738       | 143       | 2.23      |
|                         | Rep 3          | 98.1                  | 230                  | 18.1                  | 2581                  | 7683      | 27.6      | 3461      | 3062      | 1113      | 716       | 136       | 2.51      |
|                         | <b>Average</b> | 97.5                  | 229                  | 18.1                  | 2560                  | 2.51      | 24.3      | 1407      | 1.54      | 1122      | 724       | 137       | 2.21      |
|                         | <b>%RSD</b>    | 0.890                 | 1.54                 | 1.35                  | 2.90                  | NA        | 18.8      | 103       | 127       | 0.87      | 1.38      | 3.50      | 11.9      |
| <b>Average</b>          |                | 93.8                  | 210                  | 17.3                  | 2351                  | 3.14      | 13.5      | 880       | 0.293     | 1105      | 729       | 130       | 1.63      |
| <b>% Diff from pool</b> |                | -3.77                 | -8.37                | -3.90                 | -8.15                 | 25.2      | -44.3     | -37.5     | -81.0     | -1.49     | 0.650     | -5.15     | -26.2     |



**Table S5. Whole Blood Intraday Analysis Results (ng element/mL sample), Day 1**

| <b>Sample</b> |                | <b>Ca<sup>a</sup></b> | <b>K<sup>a</sup></b> | <b>Mg<sup>a</sup></b> | <b>Na<sup>a</sup></b> | <b>Cr</b> | <b>Mn</b> | <b>Fe<sup>a</sup></b> | <b>Co</b> | <b>Cu</b> | <b>Zn</b> | <b>Se</b> | <b>Mo</b> |
|---------------|----------------|-----------------------|----------------------|-----------------------|-----------------------|-----------|-----------|-----------------------|-----------|-----------|-----------|-----------|-----------|
| 1             | Rep 1          | 58.1                  | 1655                 | 28.0                  | 1527                  | ND        | 15.6      | 488                   | 0.447     | 951       | 7607      | 204       | ND        |
|               | Rep 2          | 60.0                  | 1717                 | 28.5                  | 1570                  | (51.3)    | 15.6      | 497                   | (53.3)    | 938       | 7527      | 203       | ND        |
|               | Rep 3          | 62.2                  | 1801                 | 29.5                  | 1678                  | ND        | 15.5      | 517                   | 0.567     | 960       | 7747      | 225       | ND        |
|               | <b>Average</b> | 60.1                  | 1725                 | 28.7                  | 1592                  | ND        | 15.6      | 500                   | 0.507     | 950       | 7627      | 211       | ND        |
|               | <b>%RSD</b>    | 2.77                  | 3.47                 | 2.16                  | 3.99                  | NA        | 0.210     | 2.39                  | 16.7      | 0.954     | 1.19      | 4.69      | NA        |
| 2             | Rep 1          | 63.0                  | 1983                 | 34.7                  | 1488                  | 1.70      | 28.1      | 480                   | 0.647     | 1022      | 6143      | 196       | ND        |
|               | Rep 2          | 70.0                  | 2032                 | 36.4                  | 1599                  | ND        | 27.6      | 493                   | 0.727     | 1025      | 6239      | 208       | 1.09      |
|               | Rep 3          | 65.3                  | 2025                 | 36.3                  | 1513                  | ND        | 27.7      | 509                   | 0.727     | 1019      | 7095      | 208       | ND        |
|               | <b>Average</b> | 66.1                  | 2014                 | 35.8                  | 1534                  | 1.70      | 27.8      | 494                   | 0.700     | 1022      | 6493      | 204       | 1.087     |
|               | <b>%RSD</b>    | 4.41                  | 1.07                 | 2.18                  | 3.10                  | NA        | 0.733     | 2.38                  | 5.39      | 0.256     | 6.59      | 2.60      | NA        |
| 3             | Rep 1          | 64.9                  | 1894                 | 40.0                  | 1792                  | (762)     | 17.4      | 496                   | (1176)    | 1010      | 5819      | 151       | 1.29      |
|               | Rep 2          | 67.9                  | 1900                 | 42.2                  | 1685                  | ND        | 16.1      | 524                   | 0.567     | 1057      | 6159      | 178       | ND        |
|               | Rep 3          | 65.0                  | 1800                 | 40.3                  | 1547                  | (108711)  | 216       | 512                   | (19844)   | 1051      | 5855      | 159       | ND        |
|               | <b>Average</b> | 65.9                  | 1865                 | 40.8                  | 1675                  | ND        | 16.8      | 511                   | 0.567     | 1039      | 5945      | 163       | 1.29      |
|               | <b>%RSD</b>    | 2.15                  | 2.46                 | 2.38                  | 5.99                  | NA        | 5.57      | 2.18                  | NA        | 2.02      | 2.57      | 7.07      | NA        |
| 4             | Rep 1          | 69.3                  | 1855                 | 34.5                  | 1574                  | ND        | 12.4      | 505                   | 0.567     | 1366      | 6483      | 198       | ND        |
|               | Rep 2          | 65.2                  | 1816                 | 32.8                  | 1663                  | 0.420     | 12.7      | 483                   | 0.487     | 1351      | 6379      | 217       | 1.69      |
|               | Rep 3          | 66.1                  | 1851                 | 33.4                  | 1692                  | ND        | 13.1      | 489                   | 0.487     | 1373      | 6499      | 207       | 1.73      |
|               | <b>Average</b> | 66.9                  | 1841                 | 33.6                  | 1643                  | 0.420     | 12.7      | 492                   | 0.513     | 1363      | 6454      | 208       | 1.71      |
|               | <b>%RSD</b>    | 2.66                  | 0.952                | 2.00                  | 3.06                  | NA        | 2.44      | 1.90                  | 7.35      | 0.651     | 0.824     | 3.72      | 1.66      |

**Table S5 (ct'd). Whole Blood Interday Analysis Results (ng element/mL sample), Day 1**

| <b>Sample</b>           |                | <b>Ca<sup>a</sup></b> | <b>K<sup>a</sup></b> | <b>Mg<sup>a</sup></b> | <b>Na<sup>a</sup></b> | <b>Cr</b> | <b>Mn</b> | <b>Fe<sup>a</sup></b> | <b>Co</b> | <b>Cu</b> | <b>Zn</b> | <b>Se</b> | <b>Mo</b> |
|-------------------------|----------------|-----------------------|----------------------|-----------------------|-----------------------|-----------|-----------|-----------------------|-----------|-----------|-----------|-----------|-----------|
| 5                       | Rep 1          | 60.7                  | 1785                 | 38.2                  | 1690                  | ND        | 18.8      | 501                   | 1.05      | 718       | 5655      | 194       | 1.85      |
|                         | Rep 2          | 56.3                  | 1687                 | 36.7                  | 1460                  | ND        | 19.3      | 474                   | 0.447     | 710       | 5703      | 191       | ND        |
|                         | Rep 3          | 59.2                  | 1742                 | 37.6                  | 1660                  | ND        | 17.9      | 493                   | 0.447     | 702       | 5627      | 198       | 1.45      |
|                         | <b>Average</b> | 58.7                  | 1738                 | 37.5                  | 1604                  | ND        | 18.7      | 489                   | 0.647     | 710       | 5662      | 194       | 1.65      |
|                         | <b>%RSD</b>    | 3.08                  | 2.31                 | 1.66                  | 6.37                  | NA        | 3.08      | 2.33                  | 43.7      | 0.943     | 0.554     | 1.45      | 17.2      |
| 6                       | Rep 1          | 60.9                  | 1645                 | 36.7                  | 1701                  | ND        | 18.4      | 462                   | 0.407     | 1134      | 6943      | 194       | 1.57      |
|                         | Rep 2          | 62.7                  | 1742                 | 37.9                  | 1771                  | 1.22      | 19.9      | 474                   | 0.527     | 1141      | 6959      | 212       | 1.93      |
|                         | Rep 3          | 60.8                  | 1681                 | 36.6                  | 1557                  | ND        | 22.1      | 460                   | 0.407     | 1132      | 6867      | 187       | ND        |
|                         | <b>Average</b> | 61.4                  | 1690                 | 37.1                  | 1677                  | 1.22      | 20.1      | 465                   | 0.447     | 1136      | 6923      | 198       | 1.75      |
|                         | <b>%RSD</b>    | 1.41                  | 2.37                 | 1.53                  | 5.31                  | NA        | 7.58      | 1.37                  | 12.7      | 0.348     | 0.580     | 5.26      | 14.6      |
| Pool                    | Rep 1          | 64.7                  | 1733                 | 35.5                  | 1693                  | ND        | 16.8      | 486                   | 0.527     | 1024      | 6415      | 188       | 2.01      |
|                         | Rep 2          | 63.7                  | 1730                 | 34.5                  | 1692                  | 0.660     | 18.0      | 474                   | 0.567     | 1023      | 6407      | 205       | 2.45      |
|                         | Rep 3          | 64.0                  | 1724                 | 34.6                  | 1677                  | ND        | 17.5      | 473                   | 0.527     | 1001      | 6243      | 192       | 2.05      |
|                         | <b>Average</b> | 64.1                  | 1729                 | 34.9                  | 1688                  | 0.660     | 17.4      | 477                   | 0.540     | 1016      | 6355      | 195       | 2.17      |
|                         | <b>%RSD</b>    | 0.604                 | 0.216                | 1.29                  | 0.434                 | NA        | 2.73      | 1.32                  | 3.49      | 1.06      | 1.25      | 3.80      | 9.17      |
| <b>Average</b>          |                | 63.2                  | 1812                 | 35.6                  | 1621                  | 1.11      | 18.6      | 492                   | 0.577     | 1037      | 6517      | 196       | 1.49      |
| <b>% Diff from pool</b> |                | -1.47                 | 4.78                 | 1.99                  | -3.97                 | 68.7      | 6.83      | 3.03                  | 6.79      | 2.01      | 2.55      | 0.747     | -31.0     |

**Table S6. Whole Blood Intraday Analysis Results (ng element/mL sample), Day 2**

| <b>Sample</b> |                | <b>Ca<sup>a</sup></b> | <b>K<sup>a</sup></b> | <b>Mg<sup>a</sup></b> | <b>Na<sup>a</sup></b> | <b>Cr</b> | <b>Mn</b> | <b>Fe<sup>a</sup></b> | <b>Co</b> | <b>Cu</b> | <b>Zn</b> | <b>Se</b> | <b>Mo</b> |
|---------------|----------------|-----------------------|----------------------|-----------------------|-----------------------|-----------|-----------|-----------------------|-----------|-----------|-----------|-----------|-----------|
| 1             | Rep 1          | 58.0                  | 1759                 | 29.3                  | 1666                  | 0.451     | 15.5      | 469                   | 0.543     | 929       | 8122      | 216       | 1.69      |
|               | Rep 2          | 62.4                  | 1837                 | 31.4                  | 1836                  | 4.21      | 16.6      | 516                   | 0.543     | 973       | 8586      | 212       | 1.97      |
|               | Rep 3          | 59.0                  | 1773                 | 29.9                  | 1675                  | (1872)    | 22.6      | 489                   | (2000)    | 956       | 8410      | 205       | 3.49      |
|               | <b>Average</b> | 59.8                  | 1790                 | 30.2                  | 1726                  | 2.33      | 18.2      | 491                   | 0.543     | 953       | 8372      | 211       | 2.38      |
|               | <b>%RSD</b>    | 3.18                  | 1.90                 | 3.02                  | 4.53                  | 114       | 17.0      | 3.87                  | 0         | 1.92      | 2.28      | 2.23      | 33.2      |
| 2             | Rep 1          | 58.7                  | 2023                 | 35.2                  | 1556                  | (26666)   | 126       | 488                   | (21940)   | 1159      | 6522      | 195       | 1.69      |
|               | Rep 2          | 58.7                  | 2053                 | 35.0                  | 1602                  | 1.41      | 29.4      | 470                   | 0.863     | 1010      | 6626      | 206       | 1.65      |
|               | Rep 3          | 58.4                  | 2030                 | 34.9                  | 1577                  | ND        | 29.0      | 471                   | 0.783     | 1012      | 6574      | 211       | 1.89      |
|               | <b>Average</b> | 58.6                  | 2035                 | 35.1                  | 1578                  | 1.41      | 61.3      | 476                   | 0.823     | 1060      | 6574      | 204       | 1.74      |
|               | <b>%RSD</b>    | 0.291                 | 0.630                | 0.343                 | 1.19                  | NA        | 74.1      | 1.74                  | 6.87      | 6.59      | 0.646     | 3.13      | 6.02      |
| 3             | Rep 1          | 56.8                  | 1825                 | 38.3                  | 1582                  | ND        | 15.6      | 462                   | 0.423     | 988       | 6234      | 173       | 1.89      |
|               | Rep 2          | 56.4                  | 1815                 | 38.1                  | 1542                  | ND        | 15.6      | 462                   | 0.423     | 1002      | 6358      | 159       | 1.65      |
|               | Rep 3          | 61.2                  | 1913                 | 40.6                  | 1643                  | 0.491     | 15.9      | 498                   | 0.383     | 1026      | 6666      | 176       | 1.81      |
|               | <b>Average</b> | 58.2                  | 1851                 | 39.0                  | 1589                  | 0.491     | 15.7      | 474                   | 0.410     | 1005      | 6419      | 169       | 1.78      |
|               | <b>%RSD</b>    | 3.76                  | 2.38                 | 2.90                  | 2.61                  | NA        | 1.03      | 3.63                  | 4.60      | 1.54      | 2.83      | 4.43      | 5.59      |
| 4             | Rep 1          | 66.5                  | 1842                 | 35.0                  | 1571                  | 1.41      | 13.5      | 493                   | 0.423     | 1330      | 6690      | 211       | 1.97      |
|               | Rep 2          | 65.0                  | 1851                 | 34.7                  | 1568                  | 16.8      | 15.4      | 494                   | 0.623     | 1336      | 6746      | 205       | 4.97      |
|               | Rep 3          | 58.4                  | 1701                 | 31.5                  | 1414                  | ND        | 22.2      | 435                   | 0.543     | 1324      | 6678      | 197       | 2.01      |
|               | <b>Average</b> | 63.3                  | 1798                 | 33.7                  | 1518                  | 9.09      | 17.0      | 474                   | 0.530     | 1330      | 6704      | 204       | 2.98      |
|               | <b>%RSD</b>    | 5.54                  | 3.82                 | 4.59                  | 4.83                  | 84.5      | 21.9      | 5.86                  | 15.5      | 0.381     | 0.442     | 2.74      | 47.1      |

**Table S6 (ct'd). Whole Blood Interday Analysis Results (ng element/mL sample), Day 2**

| <b>Sample</b>           |                | <b>Ca<sup>a</sup></b> | <b>K<sup>a</sup></b> | <b>Mg<sup>a</sup></b> | <b>Na<sup>a</sup></b> | <b>Cr</b> | <b>Mn</b> | <b>Fe<sup>a</sup></b> | <b>Co</b> | <b>Cu</b> | <b>Zn</b> | <b>Se</b> | <b>Mo</b> |
|-------------------------|----------------|-----------------------|----------------------|-----------------------|-----------------------|-----------|-----------|-----------------------|-----------|-----------|-----------|-----------|-----------|
| 5                       | Rep 1          | 54.5                  | 1725                 | 36.1                  | 1521                  | 0.251     | 16.7      | 448                   | 0.423     | 694       | 6058      | 190       | 2.09      |
|                         | Rep 2          | 58.0                  | 1710                 | 38.7                  | 1504                  | 1.57      | 22.5      | 490                   | 0.503     | 706       | 6158      | 194       | 2.29      |
|                         | Rep 3          | 58.5                  | 1731                 | 38.7                  | 1529                  | ND        | 17.7      | 496                   | 0.383     | 718       | 6330      | 190       | 2.01      |
|                         | <b>Average</b> | 57.0                  | 1722                 | 37.8                  | 1518                  | 0.911     | 19.0      | 478                   | 0.436     | 706       | 6182      | 191       | 2.13      |
|                         | <b>%RSD</b>    | 3.13                  | 0.513                | 3.15                  | 0.687                 | 102       | 13.4      | 4.44                  | 11.4      | 1.41      | 1.82      | 1.08      | 5.52      |
| 6                       | Rep 1          | 63.7                  | 1659                 | 38.1                  | 1620                  | 0.371     | 18.0      | 462                   | 0.383     | 1140      | 7302      | 211       | 2.01      |
|                         | Rep 2          | 60.8                  | 1597                 | 38.0                  | 1575                  | ND        | 18.3      | 459                   | 0.303     | 1124      | 7186      | 195       | 1.81      |
|                         | Rep 3          | 58.3                  | 1576                 | 37.0                  | 1528                  | 0.411     | 18.6      | 444                   | 0.503     | 1088      | 6994      | 196       | 1.65      |
|                         | <b>Average</b> | 60.9                  | 1611                 | 37.7                  | 1574                  | 0.391     | 18.3      | 455                   | 0.396     | 1117      | 7160      | 201       | 1.82      |
|                         | <b>%RSD</b>    | 3.67                  | 2.19                 | 1.28                  | 2.39                  | 7.23      | 1.16      | 1.74                  | 20.7      | 1.96      | 1.77      | 3.70      | 8.07      |
| Pool                    | Rep 1          | 60.9                  | 1716                 | 36.0                  | 1555                  | 1.05      | 16.5      | 470                   | 0.423     | 1012      | 6518      | 185       | 2.09      |
|                         | Rep 2          | 59.8                  | 1699                 | 35.9                  | 1511                  | 0.531     | 15.8      | 470                   | 0.423     | 986       | 6366      | 198       | 2.25      |
|                         | Rep 3          | 58.3                  | 1646                 | 34.5                  | 1427                  | 0.531     | 15.8      | 458                   | 0.383     | 979       | 6366      | 198       | 1.85      |
|                         | <b>Average</b> | 59.6                  | 1687                 | 35.5                  | 1498                  | 0.705     | 16.0      | 466                   | 0.410     | 992       | 6416      | 194       | 2.06      |
|                         | <b>%RSD</b>    | 1.77                  | 1.77                 | 1.89                  | 3.55                  | 34.8      | 2.12      | 1.27                  | 4.60      | 1.44      | 1.12      | 3.22      | 7.96      |
| <b>Average</b>          |                | 59.6                  | 1801                 | 35.6                  | 1584                  | 2.44      | 24.9      | 475                   | 0.523     | 1029      | 6902      | 197       | 2.14      |
| <b>% Diff from pool</b> |                | 0.0112                | 6.76                 | 0.282                 | 5.75                  | 246       | 55.5      | 1.91                  | 27.7      | 3.67      | 7.57      | 1.71      | 3.77      |

**Table S7. Whole Blood Intraday Analysis Results (ng element/mL sample), Day 3**

| <b>Sample</b> |                | <b>Ca<sup>a</sup></b> | <b>K<sup>a</sup></b> | <b>Mg<sup>a</sup></b> | <b>Na<sup>a</sup></b> | <b>Cr</b> | <b>Mn</b> | <b>Fe<sup>a</sup></b> | <b>Co</b> | <b>Cu</b> | <b>Zn</b> | <b>Se</b> | <b>Mo</b> |
|---------------|----------------|-----------------------|----------------------|-----------------------|-----------------------|-----------|-----------|-----------------------|-----------|-----------|-----------|-----------|-----------|
| 1             | Rep 1          | 61.4                  | 1623                 | 28.4                  | 1663                  | ND        | (57.0)    | 486                   | 0.736     | 999       | 9074      | 246       | 1.44      |
|               | Rep 2          | 61.0                  | 1587                 | 27.8                  | 1636                  | ND        | 10.8      | 480                   | 0.336     | 945       | 8550      | 210       | 1.12      |
|               | Rep 3          | 63.9                  | 1728                 | 29.4                  | 1824                  | ND        | 14.1      | 512                   | 0.496     | 983       | 8858      | 220       | 2.32      |
|               | <b>Average</b> | 62.1                  | 1646                 | 28.5                  | 1708                  | ND        | 12.4      | 493                   | 0.523     | 976       | 8828      | 225       | 1.63      |
|               | <b>%RSD</b>    | 2.10                  | 3.63                 | 2.20                  | 4.86                  | NA        | 18.4      | 2.76                  | 31.5      | 2.33      | 2.44      | 6.75      | 31.2      |
| 2             | Rep 1          | 60.6                  | 1858                 | 33.1                  | 1464                  | ND        | 28.1      | 467                   | 0.616     | 1004      | 6594      | 211       | 1.36      |
|               | Rep 2          | 59.9                  | 1796                 | 32.9                  | 1401                  | ND        | 30.2      | 477                   | 0.656     | 973       | 6558      | 203       | ND        |
|               | Rep 3          | 63.3                  | 1875                 | 34.2                  | 1515                  | ND        | 86.5      | 484                   | 0.736     | 1054      | 6874      | 231       | 1.24      |
|               | <b>Average</b> | 61.3                  | 1843                 | 33.4                  | 1460                  | ND        | 48.3      | 476                   | 0.669     | 1010      | 6676      | 215       | 1.30      |
|               | <b>%RSD</b>    | 2.41                  | 1.84                 | 1.74                  | 3.19                  | NA        | 56.1      | 1.43                  | 7.5       | 3.31      | 2.12      | 5.41      | 4.62      |
| 3             | Rep 1          | 57.4                  | 1627                 | 34.7                  | 1415                  | ND        | 33.0      | 437                   | 0.256     | 978       | 6246      | 149       | ND        |
|               | Rep 2          | 60.6                  | 1717                 | 36.5                  | 1545                  | ND        | 22.3      | 459                   | 0.256     | 994       | 6354      | 165       | ND        |
|               | Rep 3          | 61.9                  | 1722                 | 37.8                  | 1567                  | 0.584     | 15.3      | 485                   | 0.296     | 980       | 6330      | 178       | ND        |
|               | <b>Average</b> | 59.9                  | 1689                 | 36.3                  | 1509                  | 0.584     | 23.5      | 460                   | 0.269     | 984       | 6310      | 164       | ND        |
|               | <b>%RSD</b>    | 3.16                  | 2.58                 | 3.59                  | 4.44                  | NA        | 30.8      | 4.24                  | 7.00      | 0.704     | 0.734     | 7.18      | NA        |
| 4             | Rep 1          | 68.4                  | 1852                 | 33.7                  | 1670                  | ND        | 19.7      | 505                   | 0.296     | 1399      | 6878      | 200       | ND        |
|               | Rep 2          | 64.7                  | 1820                 | 32.5                  | 1658                  | ND        | 24.5      | 486                   | 0.216     | 1357      | 6942      | 213       | ND        |
|               | Rep 3          | 65.0                  | 1846                 | 32.5                  | 1708                  | ND        | (71.3)    | 485                   | 0.216     | 1372      | 7030      | 212       | 1.04      |
|               | <b>Average</b> | 66.1                  | 1840                 | 32.9                  | 1679                  | ND        | 22.1      | 492                   | 0.243     | 1376      | 6950      | 208       | 1.04      |
|               | <b>%RSD</b>    | 2.53                  | 0.755                | 1.69                  | 1.27                  | NA        | 15.2      | 1.85                  | 15.5      | 1.25      | 0.897     | 2.78      | NA        |

**Table S7 (ct'd). Whole Blood Interday Analysis Results (ng element/mL sample), Day 3**

| <b>Sample</b>           |                | <b>Ca<sup>a</sup></b> | <b>K<sup>a</sup></b> | <b>Mg<sup>a</sup></b> | <b>Na<sup>a</sup></b> | <b>Cr</b> | <b>Mn</b> | <b>Fe<sup>a</sup></b> | <b>Co</b> | <b>Cu</b> | <b>Zn</b> | <b>Se</b> | <b>Mo</b> |
|-------------------------|----------------|-----------------------|----------------------|-----------------------|-----------------------|-----------|-----------|-----------------------|-----------|-----------|-----------|-----------|-----------|
| 5                       | Rep 1          | 55.6                  | 1650                 | 34.5                  | 1551                  | ND        | 18.7      | 454                   | 0.176     | 685       | 6094      | 176       | ND        |
|                         | Rep 2          | 56.2                  | 1665                 | 35.0                  | 1523                  | 0.584     | 18.8      | 469                   | 0.376     | 695       | 6198      | 197       | 5.16      |
|                         | Rep 3          | 57.4                  | 1724                 | 35.8                  | 1628                  | ND        | 15.9      | 477                   | 0.256     | 722       | 6482      | 193       | ND        |
|                         | <b>Average</b> | 56.4                  | 1680                 | 35.1                  | 1568                  | 0.58      | 17.8      | 467                   | 0.269     | 700       | 6258      | 189       | 5.16      |
|                         | <b>%RSD</b>    | 1.31                  | 1.90                 | 1.55                  | 2.83                  | NA        | 7.46      | 2.02                  | 30.5      | 2.24      | 2.62      | 4.74      | NA        |
| 6                       | Rep 1          | 60.5                  | 1627                 | 35.6                  | 1668                  | ND        | 31.6      | 454                   | 0.176     | 1131      | 7254      | 192       | ND        |
|                         | Rep 2          | 61.3                  | 1661                 | 36.2                  | 1728                  | ND        | 18.4      | 457                   | 0.176     | 1146      | 7354      | 199       | ND        |
|                         | Rep 3          | 61.3                  | 1687                 | 36.2                  | 1765                  | 213       | 32.4      | 455                   | 0.376     | 1155      | 7326      | 192       | 1.92      |
|                         | <b>Average</b> | 61.0                  | 1659                 | 36.0                  | 1721                  | ND        | 27.5      | 455                   | 0.243     | 1144      | 7312      | 194       | 1.92      |
|                         | <b>%RSD</b>    | 0.658                 | 1.48                 | 0.761                 | 2.32                  | NA        | 23.4      | 0.259                 | 38.9      | 0.869     | 0.576     | 1.81      | NA        |
| Pool                    | Rep 1          | 61.2                  | 1820                 | 33.7                  | 1739                  | 3.74      | 24.2      | 465                   | 1.90      | 1002      | 5894      | 170       | ND        |
|                         | Rep 2          | 66.3                  | 1854                 | 36.1                  | 1780                  | (1151)    | 24.9      | 504                   | (1321)    | 1069      | 6298      | 189       | ND        |
|                         | Rep 3          | 66.6                  | 1826                 | 36.1                  | 1735                  | ND        | 19.9      | 506                   | 0.536     | 1050      | 6214      | 177       | ND        |
|                         | <b>Average</b> | 64.7                  | 1834                 | 35.3                  | 1752                  | 3.74      | 23.0      | 492                   | 1.22      | 1040      | 6136      | 179       | ND        |
|                         | <b>%RSD</b>    | 3.81                  | 0.808                | 3.23                  | 1.16                  | NA        | 9.71      | 3.88                  | 55.9      | 2.69      | 2.84      | 4.40      | NA        |
| <b>Average</b>          |                | 61.1                  | 1726                 | 33.7                  | 1608                  | 0.58      | 25.3      | 474                   | 0.369     | 1032      | 7056      | 199       | 2.21      |
| <b>% Diff from pool</b> |                | -5.55                 | -5.86                | -4.42                 | -8.23                 | -84.4     | 9.9       | -3.59                 | -69.6     | -0.820    | 15.0      | 11.6      | NA        |
